# Supplementary material
Source: HighWire-hosted journal article supplement (https://bmjopenquality.bmj.com/highwire/filestream/135978/field_highwire_adjunct_files/1/ds3168.docx)

| **ePCS Field** | **Percentage of Patients** |
| --- | --- |
| **Patient Medical Condition** |  |
| Main diagnoses | 67% |
| Other relevant issues – free text | 26% |
| **Advice for Out Of Hours Care** |  |
| Care Plan agreed | 84% |
| Care Plan agreed – free text | 9% |
| Preferred place of care | 40% |
| Preferred place of care – free text | 39% |
| Should GP be contacted out of hours? | 54% |
| GP Contact details | 6% |
| Resuscitation status agreed? | 90% |
| Actual resuscitation status | 47% |
| Resuscitation status – free text | 23% |
| Will GP sign death certificate in normal circumstances? | 92% |
| Will GP sign death certificate in normal circumstances? - free text | 3% |
| Additional useful OOH information –free text | 21% |
| **Current Care Arrangements** |  |
| Current Care Arrangements | 57% |
| Current Care Arrangements – free text | 23% |
| On Palliative Care | 96% |
| On Palliative Care – free text | 26% |
| Syringe driver at home | 5% |
| Catheter continence products at home | 18% |
| Moving and Handling equipment at home | 17% |
| **Patient and Carer Awareness of Condition** |  |
| Patient’s understanding of Diagnosis | 80% |
| Patient’s understanding of Prognosis | 54% |
| Carer’s understanding of Diagnosis | 64% |
| Carer’s understanding of Prognosis | 34% |
| Awareness and understanding – free text | 20% |
| **Patient & Carer Details** |  |
| Access Information / potential issues | 5% |
| Carer Details | 18% |
| Next of kin details | 32% |
| Nurse | 36% |
| Additional drugs available at home | 15% |

Table 2: The percentage of patients with each completed ePCS field (N=185). 2012.


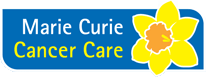


Figure 1: Percentage completion of ePCS (N=185). 2012.


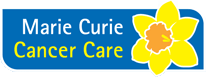

Supplement: ds3168.docx [file ds3168.docx]
